# Supplementary material for: Tube-like α-Fe2O3@Ag/AgCl heterostructure: controllable synthesis and enhanced plasmonic photocatalytic activity
Source: Royal Society of Chemistry journal article supplement (doi:10.1039/c5ra10247b), 2015-01-01
Supplement: c5ra10247b1.pdf [file c5ra10247b1.pdf]

## Supporting Information

### Tube-like $\alpha\text{-Fe}_2\text{O}_3@Ag/AgCl$ Heterostructure: Controllable Synthesis and Enhanced Plasmonic Photocatalytic Activity

*Jun Liu,<sup>a, b</sup> Wei Wu,<sup>a, b, c\*</sup> Qingyong Tian,<sup>a, b</sup> Shuanglei Yang,<sup>b</sup> Lingling Sun,<sup>a, b</sup>*

*Xiangheng Xiao,<sup>a\*</sup> Feng Ren,<sup>a</sup> Changzhong Jiang,<sup>a</sup> Vellaisamy A.L. Roy<sup>c\*</sup>*

<sup>a</sup>Key Laboratory of Artificial Micro- and Nano-structures of Ministry of Education,  
School of Physics and Technology, Wuhan University, Wuhan 430072, P. R. China

<sup>b</sup>Laboratory of Printable Functional Nanomaterials and Printed Electronics, School of  
Printing and Packaging, Wuhan University, Wuhan 430072, P. R. China

<sup>c</sup>Department of Physics and Materials Science, City University of Hong Kong, Hong  
Kong SAR, P. R. China

---

\*To whom correspondence should be addressed. Tel: +86-27-68778529. Fax: +86-27-68778433.  
E-mail: [weiwu@whu.edu.cn](mailto:weiwu@whu.edu.cn) (W. Wu), [xxh@whu.edu.cn](mailto:xxh@whu.edu.cn) (X.H. Xiao) and [val.roy@cityu.edu.hk](mailto:val.roy@cityu.edu.hk)  
(V.A.L. Roy).

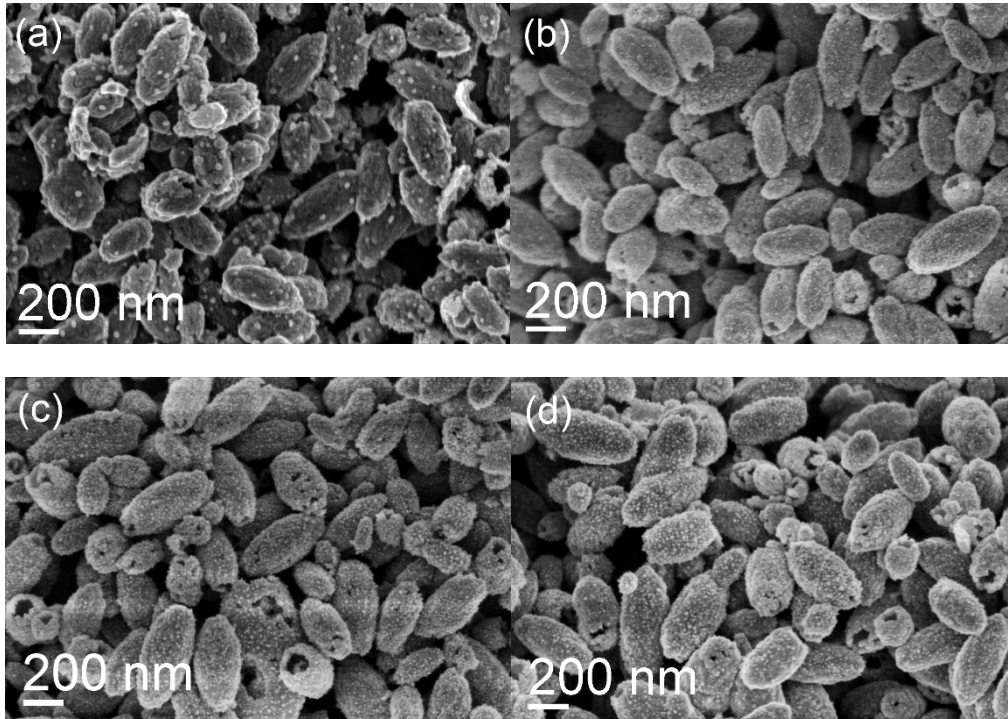

Figure S1. SEM images of  $\alpha\text{-Fe}_2\text{O}_3\text{@Ag}$  SNTs with different Ag ions addition, (a) 0.1 mM, (b) 0.2 mM, (c) 0.4 mM and (d) 0.8 mM

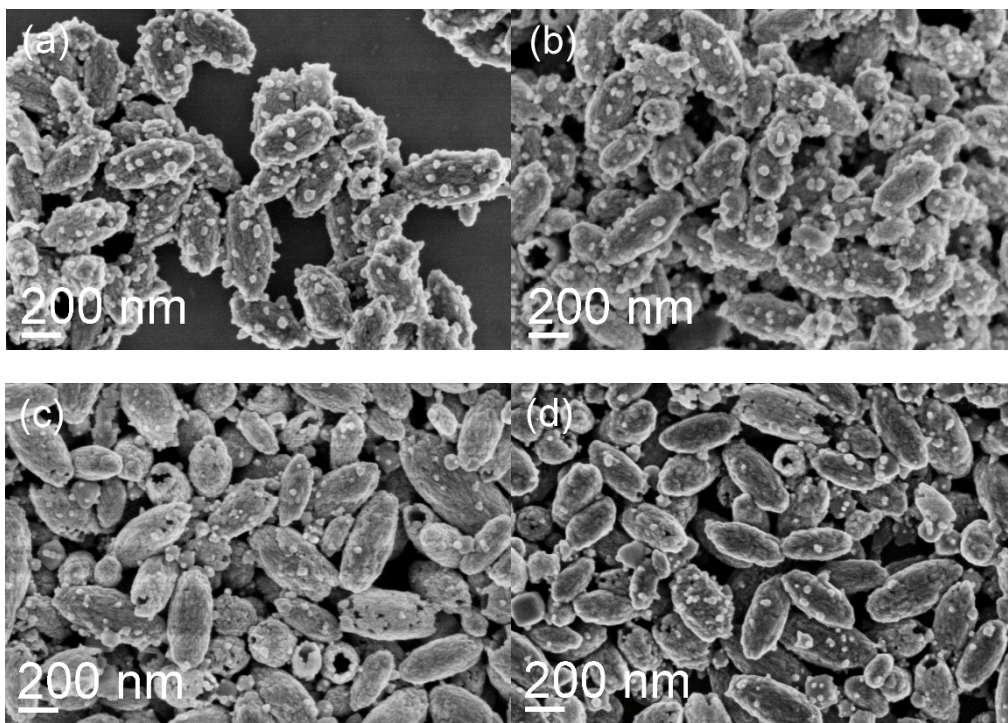

Figure S2. SEM images of  $\alpha\text{-Fe}_2\text{O}_3\text{@Ag/AgCl}$  SNTs with different  $\text{FeCl}_3$  oxidant addition. (a) 0.5 mL (sample S1), (b) 1.0 mL (sample S2), (c) 1.5 mL (sample S3), (d) 2.0 mL (sample S4)

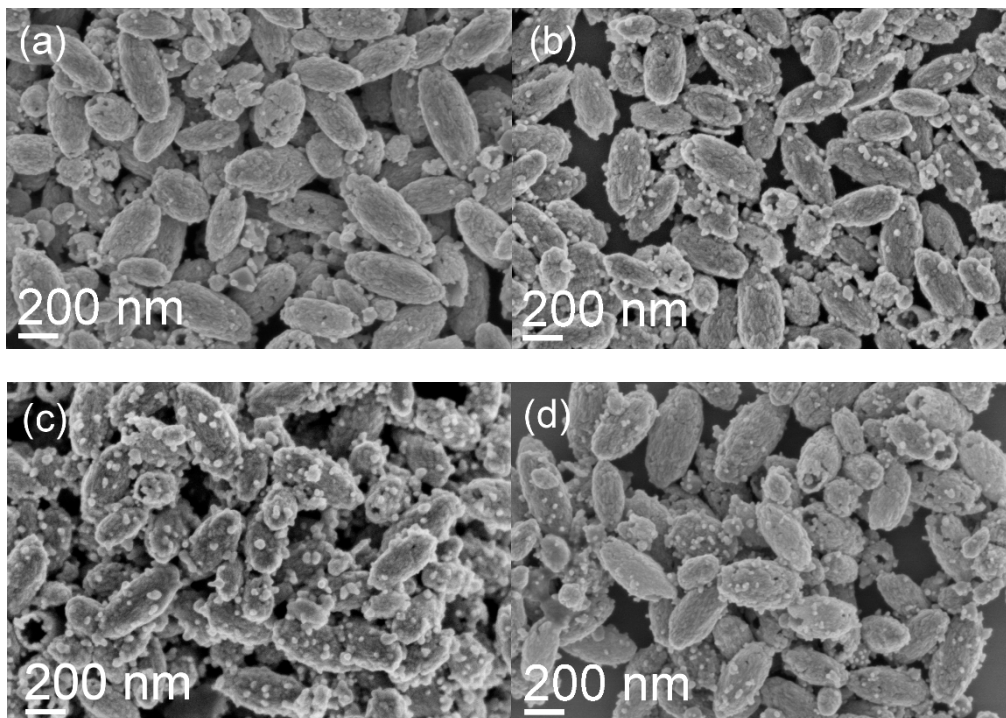

Figure S3. SEM images of  $\alpha\text{-Fe}_2\text{O}_3\text{@Ag/AgCl}$  SNTs which are produced by oxidation of the corresponding  $\alpha\text{-Fe}_2\text{O}_3\text{@Ag}$  SNTs with different Ag ions addition in Figure S1. (a) 0.1 mM (sample S5), (b) 0.2 mM (sample S6), (c) 0.4 mM (sample S2) and (d) 0.8 mM (sample S7)

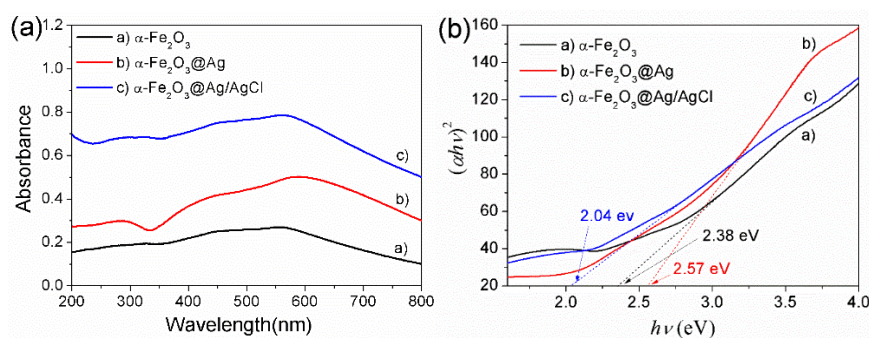

Figure S4. (a) UV-visible absorption spectra of  $\alpha\text{-Fe}_2\text{O}_3$  a),  $\alpha\text{-Fe}_2\text{O}_3\text{@Ag}$  b) and  $\alpha\text{-Fe}_2\text{O}_3\text{@Ag/AgCl}$  c, sample 2); (b) The  $(ah\nu)^2\text{-}h\nu$  curves of  $\alpha\text{-Fe}_2\text{O}_3$  a),  $\alpha\text{-Fe}_2\text{O}_3\text{@Ag}$  b) and  $\alpha\text{-Fe}_2\text{O}_3\text{@Ag/AgCl}$  c).
